# Supplementary material for: Validation of the Aeolus Level-2B wind product over Northern Canada and the Arctic
Source: Copernicus journal article supplement (doi:10.5194/amt-15-4443-2022), 2022-08-02
Supplement: Supplementary file 1 [file amt-15-4443-2022-supplement.zip]

Archive with 4 entries (4 files):
- figS01.png
- figS02.png
- amt-15-4443-2022-supplement-title-page.pdf
- Supplementary Tables.pdf
