# Supplementary material for: Validation of the Aeolus Level-2B wind product over Northern Canada and the Arctic
Source: Copernicus journal article supplement (doi:10.5194/amt-15-4443-2022), 2022-08-02
Supplement: Supplementary file 1 [file amt-15-4443-2022-supplement.zip › amt-15-4443-2022-supplement-title-page.pdf]

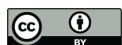

*Supplement of*

## **Validation of the Aeolus Level-2B wind product over Northern Canada and the Arctic**

**Chih-Chun Chou et al.**

*Correspondence to:* Chih-Chun Chou ([gina.chou@mail.utoronto.ca](mailto:gina.chou@mail.utoronto.ca))

- [amt-15-4443-2022-supplement-title-page.pdf](#)
- [Supplementary Tables.pdf](#)
- [figS01.png](#)
- [figS02.png](#)

The copyright of individual parts of the supplement might differ from the article licence.
