# Supplementary material for: Validation of the Aeolus Level-2B wind product over Northern Canada and the Arctic
Source: Copernicus journal article supplement (doi:10.5194/amt-15-4443-2022), 2022-08-02
Supplement: Supplementary file 1 [file amt-15-4443-2022-supplement.zip › Supplementary Tables.pdf]

| Datasets      | Locations                         | Iqaluit  |     | Whitehorse |     |
|---------------|-----------------------------------|----------|-----|------------|-----|
|               | Channels<br># of<br>msmt/profiles | Rayleigh | Mie | Rayleigh   | Mie |
| ECCC-B/ERA5   | N                                 | 215      | 70  | 184        | 38  |
|               | p                                 | 20       | 16  | 18         | 11  |
| Radiosondes   | N                                 | 193      | 60  | 184        | 38  |
|               | p                                 | 18       | 14  | 18         | 11  |
| Ka-band radar | N                                 | 12       | 37  |            |     |
|               | p                                 | 8        | 13  |            |     |

**Table S1.** Number of measurements (N) and number of profiles (p) to calculate the adjusted r-squared in Table 1.

| Seasons                           | 2018-09-15 to 2018-10-16 |     | 2019-08-02 to 2019-09-30 |      | 2019-12-01 to 2020-01-31 |      |
|-----------------------------------|--------------------------|-----|--------------------------|------|--------------------------|------|
| Channels<br># of<br>msmt/profiles | Rayleigh                 | Mie | Rayleigh                 | Mie  | Rayleigh                 | Mie  |
| N                                 | 1639                     | 398 | 4070                     | 3372 | 5120                     | 1228 |
| p                                 | 86                       | 68  | 169                      | 170  | 192                      | 141  |

**Table S2.** Number of measurements (N) and number of profiles (p) to calculate the adjusted r-squared in Fig.5. The number of measurements and profiles are the same for ECCC-B, ERA5, and radiosondes.

| Seasons                           | 2018-09-15 to 2018-10-16 |       | 2019-08-02 to 2019-09-30 |                 | 2019-12-01 to 2020-01-31 |        |
|-----------------------------------|--------------------------|-------|--------------------------|-----------------|--------------------------|--------|
| Channels<br># of<br>msmt/profiles | Rayleigh                 | Mie   | Rayleigh                 | Mie             | Rayleigh                 | Mie    |
| N                                 | 214821                   | 70045 | 721223 (813691)          | 516253 (606942) | 871560                   | 199228 |
| p                                 | 21358                    | 15010 | 42212 (43757)            | 154409 (173906) | 45368                    | 62470  |

**Table S3.** Number of measurements (N) and number of profiles (p) over the Arctic during fall 2018, summer 2019, and winter 2020 from the near real-time product (reprocessed product).
