# Supplementary figures and images for: Validation of the Aeolus Level-2B wind product over Northern Canada and the Arctic
Source: Copernicus journal article supplement (doi:10.5194/amt-15-4443-2022), 2022-08-02

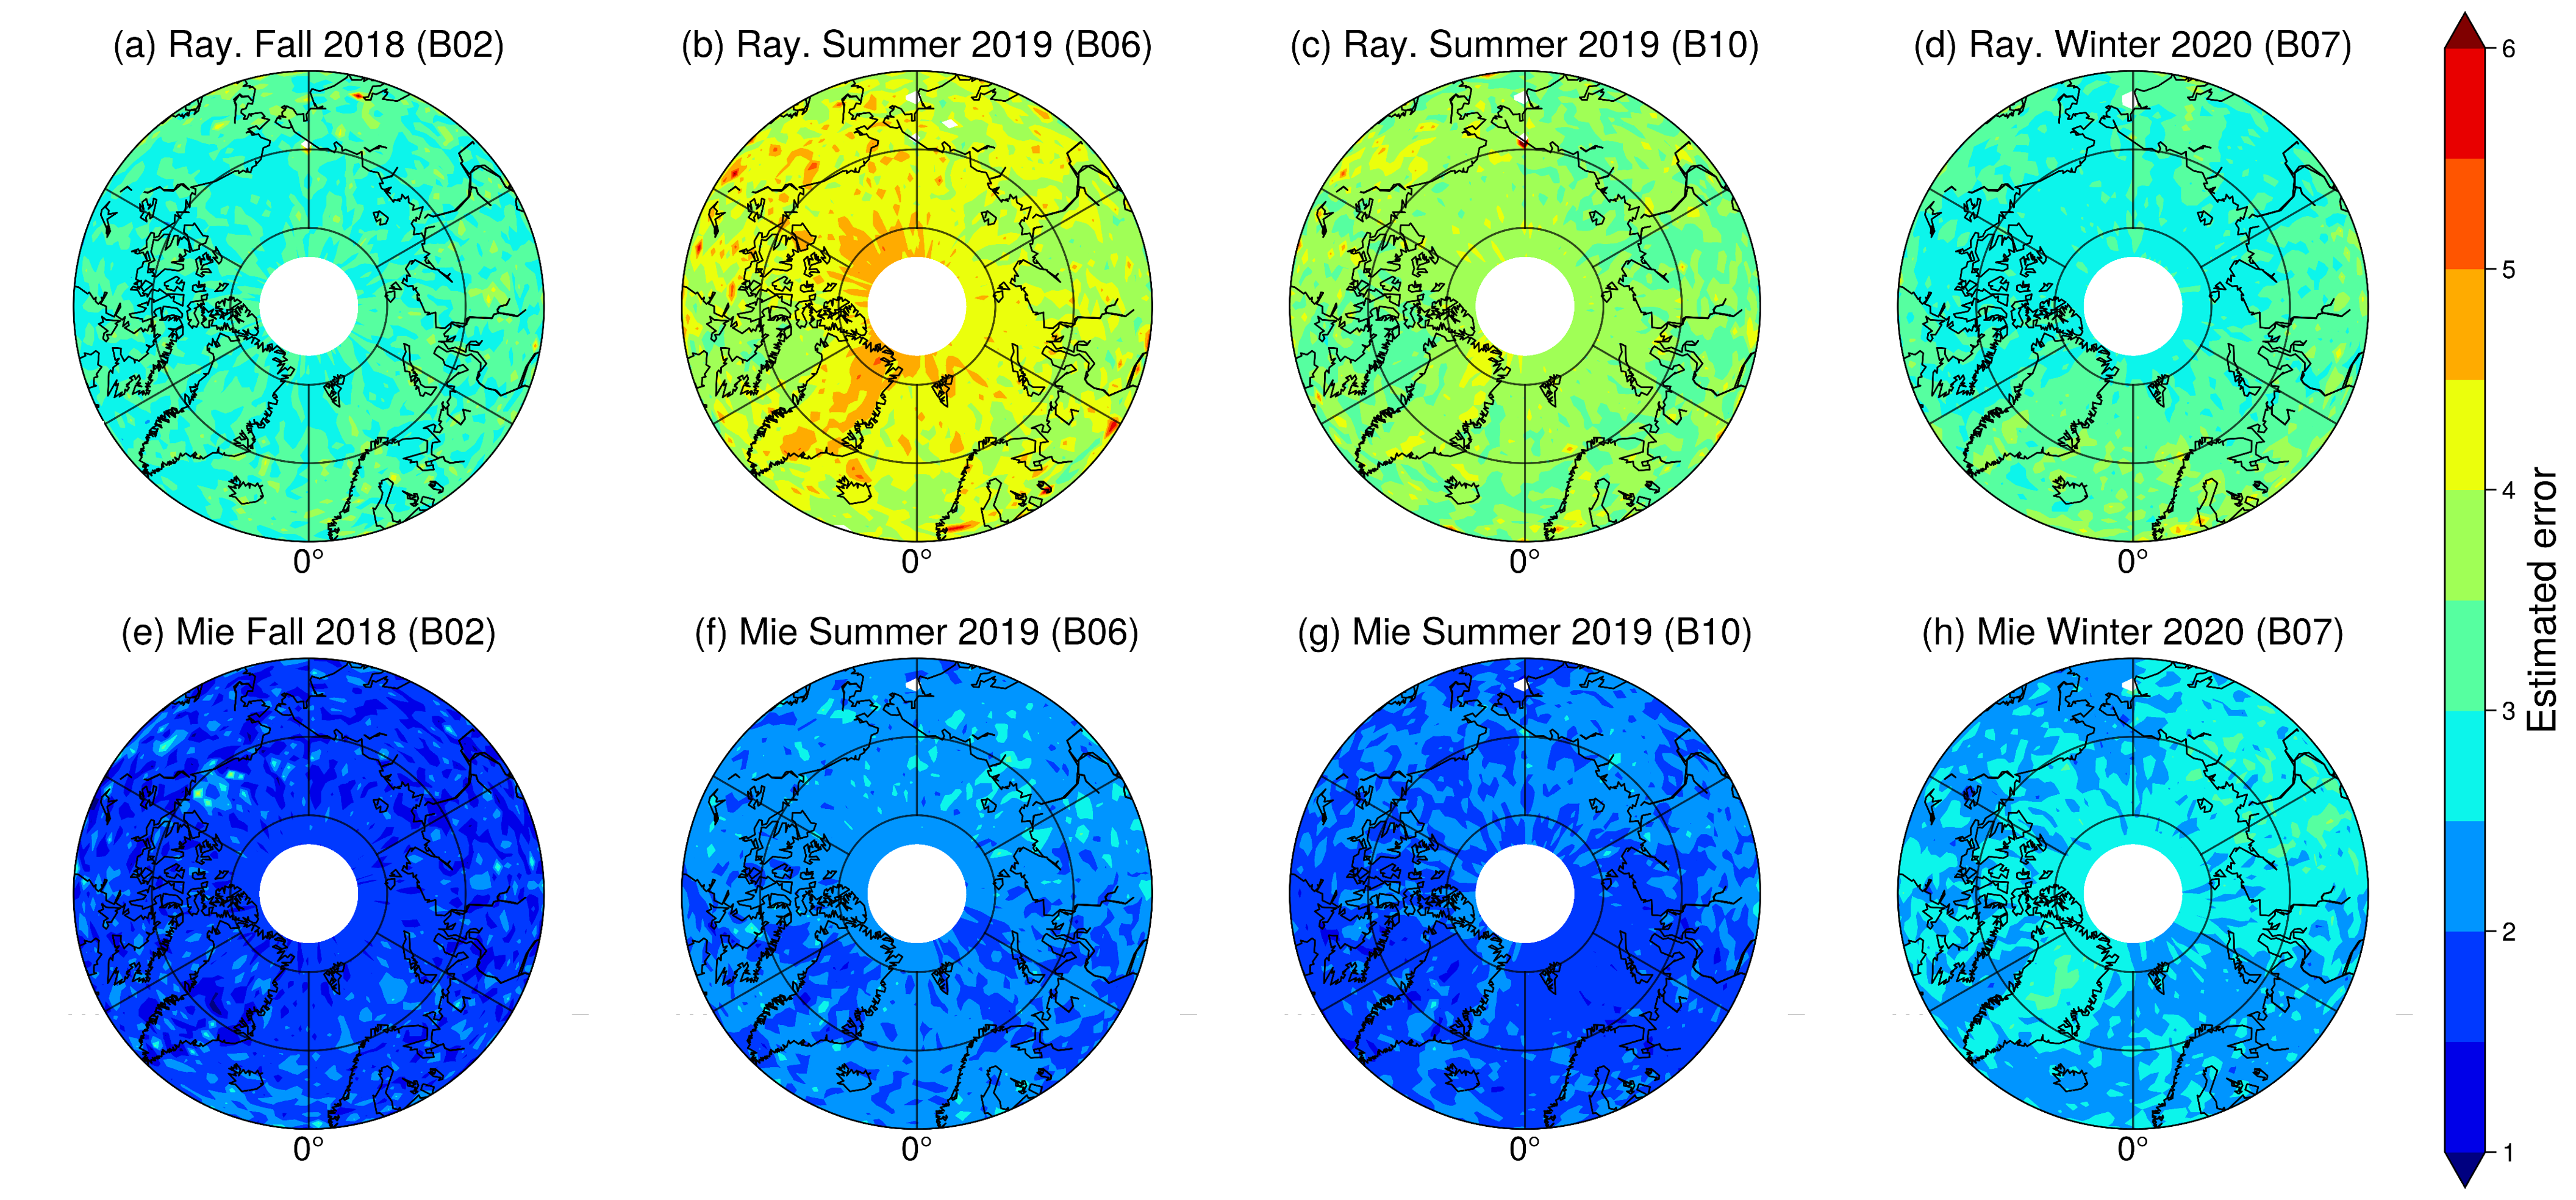

Supplement: Supplementary file 1 [file amt-15-4443-2022-supplement.zip › figS01.png]

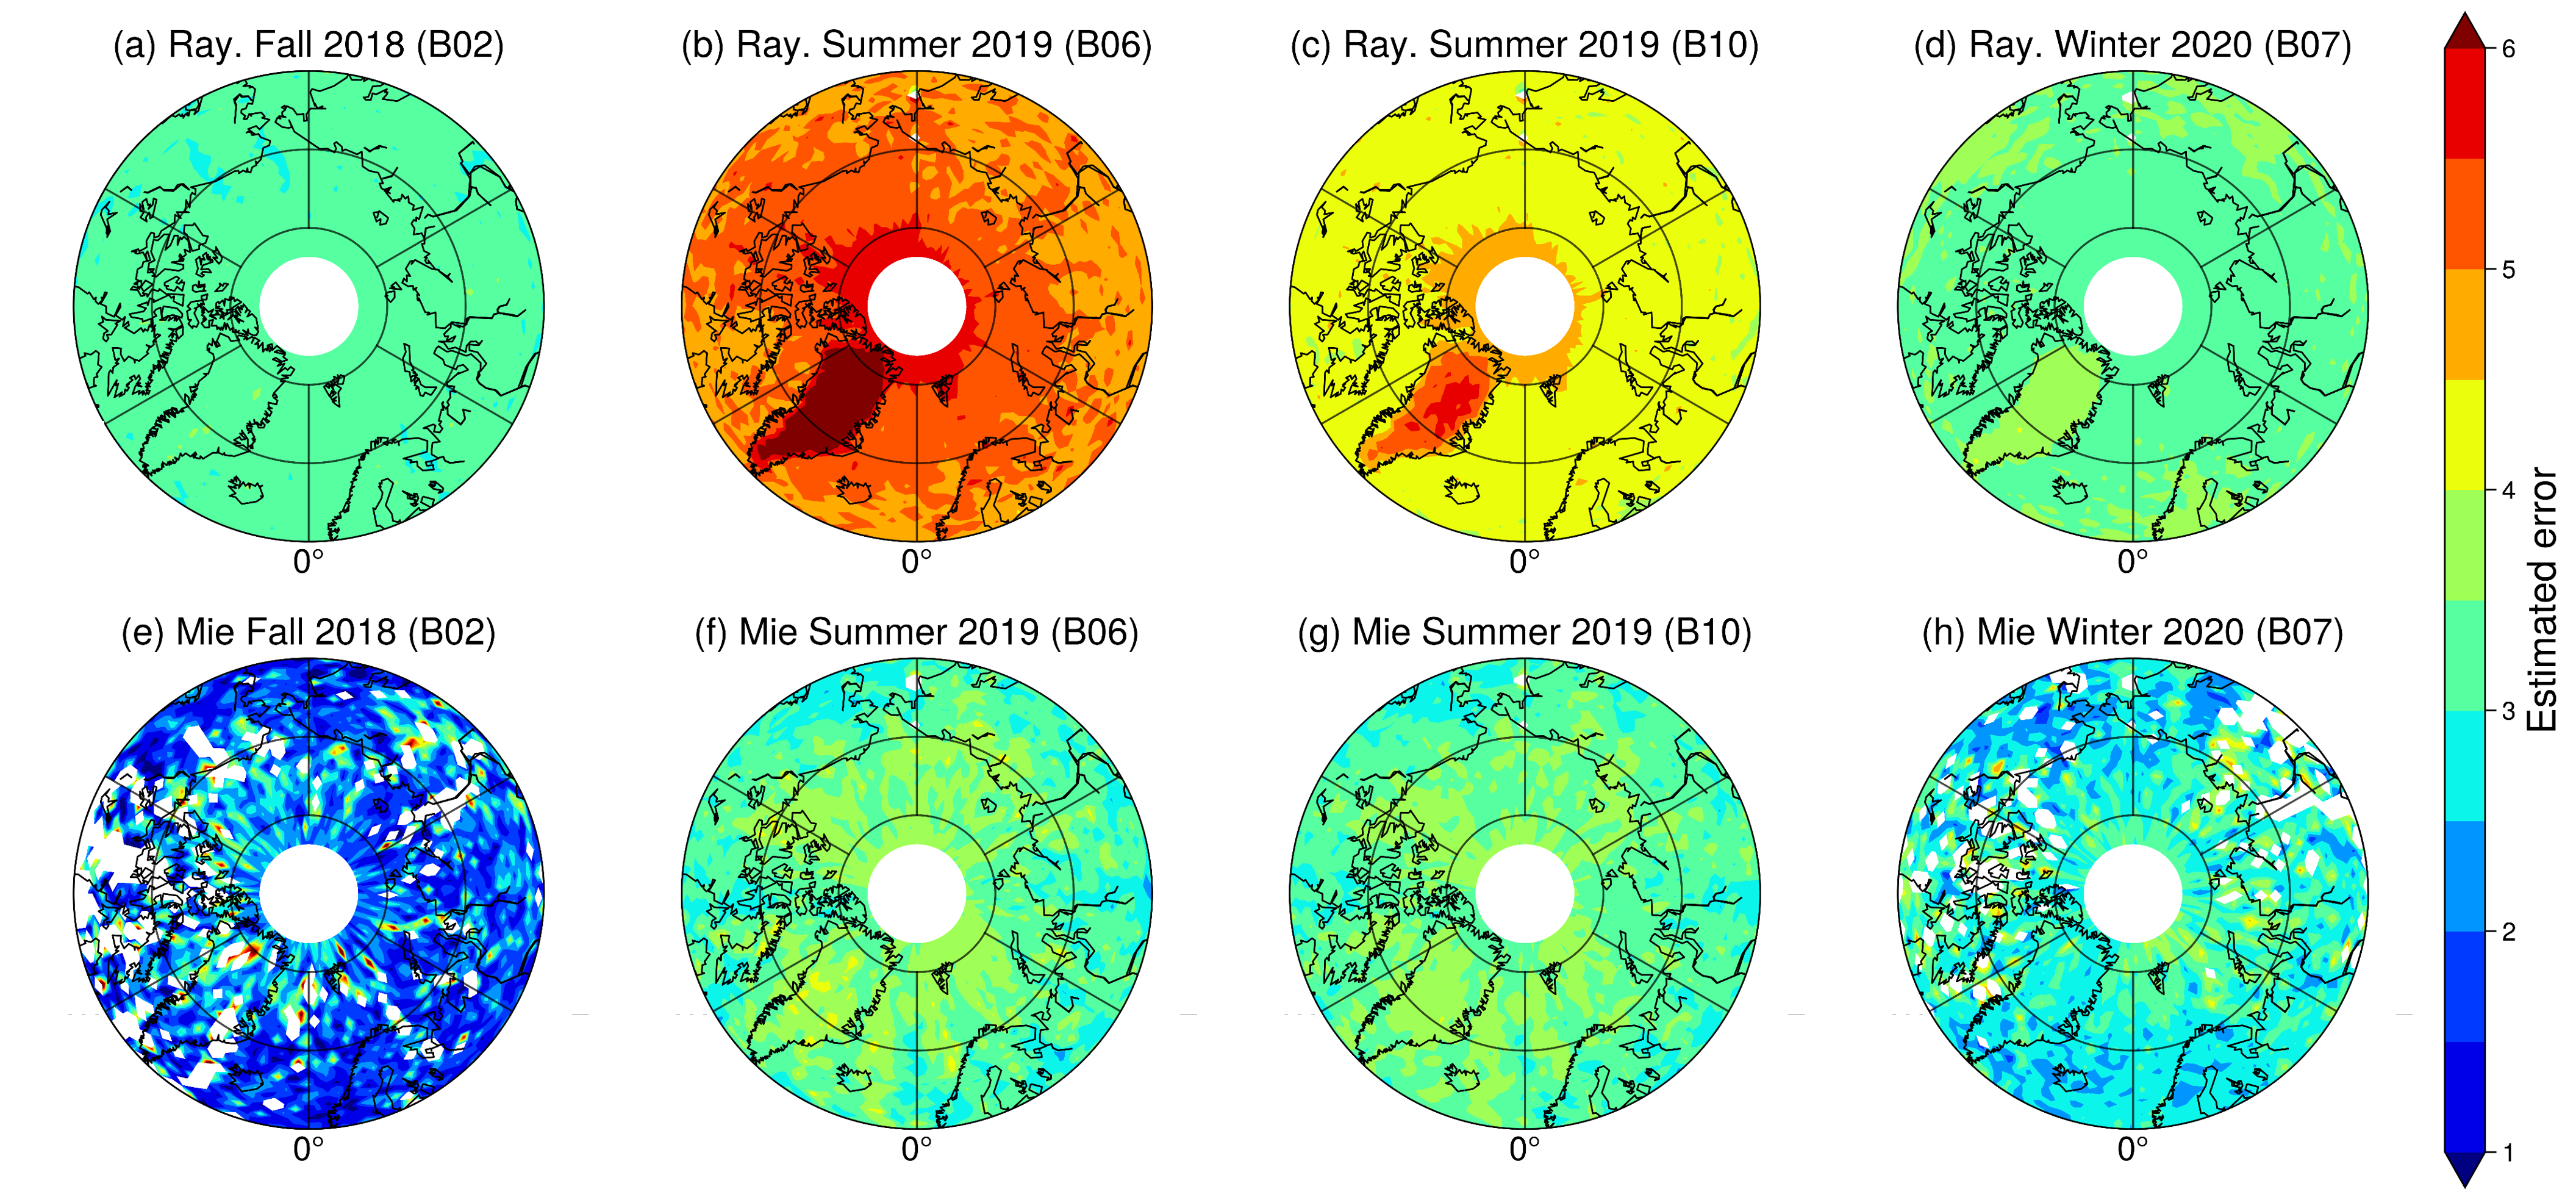

Supplement: Supplementary file 1 [file amt-15-4443-2022-supplement.zip › figS02.png]
